# Supplementary material
Source: PubMed Central journal article supplement (PMC3125489)
Supplement: NIHMS275512-supplement-Supp_Table_S1.pdf [file NIHMS275512-supplement-Supp_Table_S1.pdf]

## Trempus, et al 2010

Supplemental Table SI. Sequence analysis of mouse *c-Ha-ras* codon 61 to confirm DMBA-induced mutation in parental and transfected cell lines and tumors.

| Sample Identification                  | Sequence of codon 61, mouse <i>c-Ha-ras</i> |
|----------------------------------------|---------------------------------------------|
| WT control DNA <sup>a</sup>            | AGGTCAAGAA                                  |
|                                        |                                             |
| FVB217 parental cell line <sup>b</sup> | AGGTCTAGAA                                  |
| FVB217 tumor-1 <sup>c</sup>            | AGGTCTAGAA                                  |
| FVB217 tumor-2                         | AGGTCTAGAA                                  |
| FVB217 tumor-3                         | AGGTCTAGAA                                  |
| FVB217 tumor-4                         | AGGTCTAGAA                                  |
|                                        |                                             |
| Tbx1.Mock cell line <sup>b</sup>       | AGGTCTAGAA                                  |
| Tbx1.Mock tumor-1 <sup>d</sup>         | AGGTCTAGAA                                  |
| Tbx1.Mock tumor-2                      | AGGTCTAGAA                                  |
|                                        |                                             |
| Tbx1.14M cell line <sup>b</sup>        | AGGTCTAGAA                                  |
| Tbx1.14M tumor-1 <sup>d</sup>          | AGGTCTAGAA                                  |
| Tbx1.14M tumor-2                       | AGGTCTAGAA                                  |
|                                        |                                             |
| Tbx1.11S cell line <sup>b</sup>        | AGGTCTAGAA                                  |
| Tbx1.11S tumor-1 <sup>d</sup>          | AGGTCTAGAA                                  |
| Tbx1.11S tumor-2                       | AGGTCTAGAA                                  |

<sup>a</sup>Sample source DNA from a mouse skin tumor obtained from a *v-Ha-ras* Tg.AC mouse

<sup>b</sup>Tumor cells (parental and transfected) grown to 80% confluency, harvested, and DNA isolated using Qiagen DNAeasy kit.

<sup>c</sup>FVB/N mice were injected intradermally with 200,000 FVB217 parental cells, tumors collected 2 weeks after injection.

<sup>d</sup>FVB/N mice were injected intradermally with 200,000 Mock, 14M, or 11S clones, tumors collected 13 days after injection.
